# Supplementary material for: Gut Microbiota Differences According to Ultra-Processed Food Consumption in a Spanish Population
Source: MDPI journal article supplement (doi:10.3390/nu13082710), 2021-08-06
Supplement: s1 [file s1]

**Supplementary Table S1.** Ultraprocessed food (and subclassification) included in the food-frequency questionnaire used for this study.

| Ultraprocessed food groups      | Food-frequency questionnaire                                                                                                                                                         |
|---------------------------------|--------------------------------------------------------------------------------------------------------------------------------------------------------------------------------------|
| Dairy products                  | Packaged cream, smoothies, milk drinks with or without flavors, <i>petit-suisse</i> , custard, “fruit” yogurts, flan, pudding, ice-creams                                            |
| Meat products                   | Ham, smoked bacon, chorizo, salami, mortadella, sausage, hamburger, pate, <i>foie-gras</i> , spicy sausage, black pudding mortadella and meatballs                                   |
| Cereals                         | Packaged breakfast cereals                                                                                                                                                           |
| Pizza                           | Pre-prepared and ready-to-heat pizzas                                                                                                                                                |
| Margarine                       | Margarine                                                                                                                                                                            |
| Fried products                  | Potato chips and fried snacks                                                                                                                                                        |
| Cookies                         | Packaged cookies and chocolate cookies                                                                                                                                               |
| Light products                  | Slimming products                                                                                                                                                                    |
| Ready-to-eat products           | Instant soups and creams, instant pasta, croquettes and powdered soups and purees                                                                                                    |
| Mayonnaise                      | Mayonnaise sauce                                                                                                                                                                     |
| Alcohol beverages               | Alcoholic drinks produced by fermentation followed by distillation such as whisky, gin, rum                                                                                          |
| Pastries                        | Packaged buns, pre-prepared pies, prepared cakes, muffins, doughnuts, croissant or other business-type pastries, <i>churros</i> , chocolates and candies, nougat and <i>marzipan</i> |
| Sugar-sweetened beverages (SSB) | Sugar refreshment, carbonated drinks and packaged fruit drinks and juices                                                                                                            |

**Supplementary Table S2.** Baseline anthropometric and biochemical characteristic of the participant excluded for microbiota analysis (subjects who consumed between 3 and 5 servings per day of UPFs).

| Variable                             | Subjects who consumed >3<br>and <5 serv/d of UPFs | Women who consumed<br>>3 and <5 serv/d of UPFs | Men who consumed >3<br>and <5 serv/d of UPFs |
|--------------------------------------|---------------------------------------------------|------------------------------------------------|----------------------------------------------|
| UPF<br>consumption<br>(serv/ d)      | 4.01 ± 0.5                                        | 4.0 ± 0.4                                      | 3.8 ± 0.4                                    |
| Age (y)                              | 45 ± 1                                            | 44 ± 2                                         | 45 ± 1                                       |
| Smoking                              | 38                                                | 25                                             | 13                                           |
| Alcohol habit                        | 109                                               | 70                                             | 39                                           |
| METs                                 | 24.9 ± 2.3                                        | 22.9 ± 2.2                                     | 30.6 ± 3.4                                   |
| Depression<br>prevalence             | 5                                                 | 5                                              | 0                                            |
| Anxiety<br>prevalence                | 7                                                 | 7                                              | 0                                            |
| Energy intake<br>(kcal)              | 2664 ± 98                                         | 2633 ± 88                                      | 2752 ± 101                                   |
| Energy from<br>UPFs (%)              | 15.1 ± 1.7                                        | 15.1 ± 1.4                                     | 14.9 ± 2.1                                   |
| Adherence to<br>MD                   | 7.5 ± 0.4                                         | 7.3 ± 0.5                                      | 6.9 ± 0.5                                    |
| BMI baseline<br>(kg/m <sup>2</sup> ) | 29.4 ± 4.8                                        | 29.2 ± 4.4                                     | 29.9 ± 4.4                                   |
| Weight (kg)                          | 80.9 ± 5.3                                        | 77.7 ± 4.8                                     | 90.3 ± 5.8                                   |
| Waist<br>circumference<br>(cm)       | 96 ± 3                                            | 93 ± 3                                         | 103 ± 5                                      |
| Hip<br>circumference<br>(cm)         | 108 ± 3                                           | 109 ± 4                                        | 105 ± 5                                      |
| PAS (mmHg)                           | 124 ± 2                                           | 120 ± 2                                        | 134 ± 5                                      |
| PAD (mmHg)                           | 77 ± 2                                            | 76 ± 3                                         | 82 ± 3                                       |
| Fat mass (kg)                        | 28.5 ± 6.3                                        | 28.9 ± 6.1                                     | 27.3 ± 5.5                                   |

|                                  |             |            |            |
|----------------------------------|-------------|------------|------------|
| <b>Visceral fat mass (kg)</b>    | 1.2 ± 0.4   | 0.9 ± 0.2  | 1.9 ± 0.6  |
| <b>Glucose (mg/dL)</b>           | 94 ± 4      | 92 ± 3     | 99 ± 4     |
| <b>Total cholesterol (mg/dL)</b> | 212 ± 4     | 211 ± 6    | 213 ± 7    |
| <b>HDL-cholesterol (mg/dL)</b>   | 58 ± 3      | 61 ± 4     | 48 ± 2     |
| <b>LDL-cholesterol (mg/dL)</b>   | 68 ± 4      | 65 ± 4     | 73 ± 5     |
| <b>Triglycerides (mg/dL)</b>     | 96 ± 6      | 89 ± 4     | 117 ± 9    |
| <b>ALT (U/L)</b>                 | 23 ± 3      | 18 ± 3     | 32 ± 6     |
| <b>AST (U/L)</b>                 | 22 ± 1      | 21 ± 1     | 25 ± 2     |
| <b>Insulin (mU/L)</b>            | 7.4 ± 2.1   | 7.4 ± 1.9  | 7.1 ± 2.2  |
| <b>Adiponectin (µg/mL)</b>       | 11.8 ± 4.2  | 13.2 ± 3.9 | 8.2 ± 3.0  |
| <b>TNF (pg/mL)</b>               | 0.8 ± 0.2   | 0.8 ± 0.1  | 0.8 ± 0.2  |
| <b>Leptin (ng/mL)</b>            | 31.1. ± 4.7 | 38.5 ± 5.3 | 11.8 ± 3.9 |
| <b>HOMA-IR</b>                   | 1.8 ± 0.2   | 1.7 ± 0.2  | 2.0 ± 0.4  |
| <b>CRP (µg/mL)</b>               | 2.5 ± 0.3   | 2.6 ± 0.4  | 2.2 ± 0.2  |

Variables are expressed as means ± SE for quantitative variables and as numbers of cases for qualitative variables. Differences between groups were assessed by t-test or Mann–Whitney test ( METs, glucose, adiponectin, ALT, AST, TNFa, HOMA-IR and CRP) according to the distribution of data and quantitative values variables were assessed by chi squared.

Serv/day: servings per day.

ALT: alanine aminotransferase, AST: aspartate aminotransferase, CRP: C-reactive protein, DBP: diastolic blood pressure, HDL-c: HDL cholesterol,

HOMA-IR: insulin resistance index, LDL-c : LDL cholesterol, MD: Mediterranean diet, MET: metabolic equivalent of tasks, SBP: systolic blood pressure, Serv/d :servings per day, TNF: tumor necrosis factor alpha, TSH: thyroid-stimulating hormone, UPF: ultra-processed food.

Each variable was analyzed using total UPFs consumption adjusted for BMI, age and energy intake, except differences in age, BMI, weight, energy form UPFs and total energy.

**Supplementary Table S3.** Non-significant bacterial taxa (FDR>0.05) analyzed by EdgeR between subjects who consumed less than 3 and more than 5 servings per day of UPFs.

|                               | log2FC    | Pvalues  | FDR      |
|-------------------------------|-----------|----------|----------|
| Genus                         |           |          |          |
| <i>Turicibacter</i>           | -0.9585   | 0.015324 | 0.077896 |
| <i>Bacteroides</i>            | 0.41952   | 0.018839 | 0.088398 |
| <i>Holdemania</i>             | 0.52153   | 0.044022 | 0.19181  |
| <i>Paraprevotella</i>         | 0.7564    | 0.080406 | 0.32699  |
| <i>Clostridium</i>            | -0.42848  | 0.088814 | 0.3386   |
| <i>Dielma</i>                 | -0.59626  | 0.10585  | 0.35948  |
| <i>Alistipes</i>              | 0.34515   | 0.10608  | 0.35948  |
| <i>Bilophila</i>              | 0.44273   | 0.11546  | 0.3707   |
| <i>Barnesiella</i>            | -0.53665  | 0.13994  | 0.40648  |
| <i>Acidaminococcus</i>        | 0.75102   | 0.1673   | 0.46387  |
| <i>Christensenella</i>        | -0.47747  | 0.20011  | 0.50986  |
| <i>Oscillospira</i>           | -0.36878  | 0.2006   | 0.50986  |
| <i>Romboutsia</i>             | 0.36267   | 0.22457  | 0.53338  |
| <i>Phascolarctobacterium</i>  | 0.54317   | 0.22734  | 0.53338  |
| <i>Haemophilus</i>            | -0.51229  | 0.24577  | 0.55526  |
| <i>Catenibacterium</i>        | 0.56088   | 0.2706   | 0.57915  |
| <i>Dorea</i>                  | -0.21554  | 0.2778   | 0.57915  |
| <i>Blautia</i>                | 0.22347   | 0.28483  | 0.57915  |
| <i>Sutterella</i>             | 0.51293   | 0.30339  | 0.597    |
| <i>Butyrivibrio</i>           | -0.46843  | 0.35303  | 0.67297  |
| <i>Melainabacter</i>          | -0.42192  | 0.42821  | 0.77321  |
| <i>Parasutterella</i>         | 0.30209   | 0.43337  | 0.77321  |
| <i>Adlercreutzia</i>          | 0.25562   | 0.44702  | 0.77321  |
| <i>Lachnoclostridium</i>      | 0.15336   | 0.45632  | 0.77321  |
| <i>Howardella</i>             | 0.22312   | 0.55574  | 0.91623  |
| <i>Oscillibacter</i>          | -0.095313 | 0.58016  | 0.93131  |
| <i>Veillonella</i>            | 0.20519   | 0.61143  | 0.93254  |
| <i>Peptococcus</i>            | -0.15082  | 0.68226  | 0.93254  |
| <i>Prevotella</i>             | -0.18811  | 0.69092  | 0.93254  |
| <i>Senegalemassilia</i>       | 0.12031   | 0.72999  | 0.93254  |
| <i>Candidatus_Soleaferrea</i> | -0.15827  | 0.73814  | 0.93254  |
| <i>Eubacterium</i>            | -0.054164 | 0.7391   | 0.93254  |
| <i>Catabacter</i>             | -0.11038  | 0.76723  | 0.93254  |
| <i>Anaerostipes</i>           | -0.14425  | 0.78042  | 0.93254  |
| <i>Victivallis</i>            | 0.1019    | 0.79862  | 0.93254  |
| <i>Allisonella</i>            | 0.094404  | 0.80763  | 0.93254  |

|                               |            |          |          |
|-------------------------------|------------|----------|----------|
| <i>Ruminococcus</i>           | 0.052355   | 0.8102   | 0.93254  |
| <i>Erysipelatoclostridium</i> | -0.082912  | 0.81323  | 0.93254  |
| <i>Faecalibacterium</i>       | 0.039918   | 0.8163   | 0.93254  |
| <i>Tyzzerella</i>             | 0.053546   | 0.82901  | 0.93254  |
| <i>Dialister</i>              | -0.10781   | 0.83578  | 0.93254  |
| <i>Butyricimonas</i>          | -0.061085  | 0.84922  | 0.93254  |
| <i>Coproccoccus</i>           | 0.028656   | 0.85056  | 0.93254  |
| <i>Odoribacter</i>            | -0.038453  | 0.8561   | 0.93254  |
| <i>Dehalobacterium</i>        | -0.041268  | 0.88126  | 0.93673  |
| <i>Fusicatenibacter</i>       | -0.024237  | 0.89066  | 0.93673  |
| <i>Streptococcus</i>          | -0.029081  | 0.93279  | 0.95033  |
| <i>Eggerthella</i>            | -0.024835  | 0.93476  | 0.95033  |
| <i>Saccharibacteria</i>       | -0.0037541 | 1        | 1        |
| <b>Family</b>                 |            |          |          |
| Porphyromonadaceae            | 0.43077    | 0.01233  | 0.098636 |
| Enterobacteriaceae            | 0.8612     | 0.056983 | 0.31802  |
| Bacteroidaceae                | 0.31836    | 0.077958 | 0.35638  |
| Coriobacteriaceae             | 0.38395    | 0.092938 | 0.37175  |
| Rikenellaceae                 | 0.34037    | 0.10461  | 0.37195  |
| Desulfovibrionaceae           | 0.40622    | 0.13647  | 0.39261  |
| Mogibacteriaceae              | -0.45222   | 0.13651  | 0.39261  |
| Clostridiaceae                | -0.34612   | 0.14723  | 0.39261  |
| Sutterellaceae                | 0.37967    | 0.17643  | 0.39751  |
| Christensenellaceae           | 0.47014    | 0.18216  | 0.39751  |
| Unclassified_Clostridiales    | 0.50169    | 0.19243  | 0.39751  |
| Acidaminococcaceae            | 0.53209    | 0.19875  | 0.39751  |
| Victivallaceae                | 0.42977    | 0.28631  | 0.53894  |
| Pasteurellaceae               | -0.43215   | 0.3151   | 0.56018  |
| Peptostreptococcaceae         | 0.26329    | 0.35898  | 0.59436  |
| Melainabacteriaceae           | -0.47076   | 0.37147  | 0.59436  |
| Lachnospiraceae               | -0.13184   | 0.45032  | 0.6862   |
| Erysipelotrichaceae           | -0.16315   | 0.47712  | 0.69399  |
| Prevotellaceae                | -0.15586   | 0.70285  | 0.9309   |
| Catabacteriaceae              | -0.1143    | 0.74462  | 0.9309   |
| Streptococcaceae              | -0.10165   | 0.74748  | 0.9309   |
| Peptococcaceae                | 0.098997   | 0.77815  | 0.9309   |
| Oscillospiraceae              | -0.043496  | 0.7869   | 0.9309   |
| Rs_045                        | -0.057159  | 0.83319  | 0.9309   |
| Veillonellaceae               | -0.076243  | 0.84363  | 0.9309   |
| Dehalobacteriaceae            | -0.039199  | 0.89564  | 0.94042  |
| Eubacteriaceae                | -0.018218  | 0.91103  | 0.94042  |
| Ruminococcaceae               | -0.010227  | 0.94312  | 0.94312  |

| Order               |           |          |          |
|---------------------|-----------|----------|----------|
| Desulfovibrionales  | 0.52781   | 0.036221 | 0.19318  |
| Enterobacterales    | 0.86802   | 0.056367 | 0.22547  |
| Coriobacterales     | 0.41669   | 0.082551 | 0.24171  |
| Burkholderiales     | 0.439     | 0.090643 | 0.24171  |
| Bacteroidales       | 0.19821   | 0.1376   | 0.31451  |
| Lactobacillales     | -0.30047  | 0.31941  | 0.61108  |
| RF32                | -0.46229  | 0.34373  | 0.61108  |
| Selenomonadales     | 0.18853   | 0.49201  | 0.78721  |
| I025                | -0.15417  | 0.55791  | 0.8115   |
| Melainabacterales   | -0.25078  | 0.63634  | 0.83841  |
| Victivallales       | 0.16264   | 0.68121  | 0.83841  |
| Clostridiales       | 0.040545  | 0.74484  | 0.83987  |
| Erysipelotrichales  | -0.033183 | 0.88881  | 0.88881  |
| Class               |           |          |          |
| Erysipelotrichi     | 0.67915   | 0.014214 | 0.11371  |
| Deltaproteobacteria | 0.51205   | 0.044448 | 0.23706  |
| Betaproteobacteria  | 0.43633   | 0.092721 | 0.33676  |
| Bacteroidia         | 0.21163   | 0.10524  | 0.33676  |
| Alphaproteobacteria | -0.58778  | 0.22564  | 0.54569  |
| Coriobacteriia      | 0.41763   | 0.23874  | 0.54569  |
| Bacilli             | -0.28093  | 0.3547   | 0.7094   |
| Negativicutes       | 0.18414   | 0.49786  | 0.79143  |
| Melainabacteria     | -0.29178  | 0.58098  | 0.79143  |
| Gammaproteobacteria | 0.16768   | 0.65982  | 0.79143  |
| TM7_3               | -0.093143 | 0.71412  | 0.79143  |
| Erysipelotrichia    | -0.081757 | 0.71512  | 0.79143  |
| Clostridia          | 0.040763  | 0.74002  | 0.79143  |
| Lentisphaeria       | 0.13126   | 0.74197  | 0.79143  |
| Phylum              |           |          |          |
| Bacteroidetes       | 0.33027   | 0.021792 | 0.087167 |
| Proteobacteria      | 0.37481   | 0.039947 | 0.10653  |
| Firmicutes          | 0.1405    | 0.17196  | 0.27514  |
| Lentisphaerae       | 0.18315   | 0.64834  | 0.86445  |
| TM7                 | -0.066766 | 0.86424  | 0.88413  |
| Melainabacteria     | -0.078499 | 0.88413  | 0.88413  |

Log2FC: logarithm 2 fold change (positive value when the abundance increases in group of consumption >5 serv/d of adjusted UPFs); FDR: False Discovery Rate.

**Supplementary Table S4.** Non-significant bacterial taxa (FDR>0.05) analyzed by EdgeR between women who consumed less than 3 and more than 5 servings per day of UPFs.

|                               | log2FC   | Pvalues  | FDR     |
|-------------------------------|----------|----------|---------|
| Genus                         |          |          |         |
| <i>Oxalobacter</i>            | 1.1599   | 0.026612 | 0.14924 |
| <i>Streptococcus</i>          | -0.75635 | 0.028426 | 0.14924 |
| <i>Veillonella</i>            | -0.89863 | 0.053702 | 0.24894 |
| <i>cc_115</i>                 | 0.72805  | 0.057862 | 0.24894 |
| <i>Saccharibacteria</i>       | -0.5763  | 0.059271 | 0.24894 |
| <i>Collinsella</i>            | 0.64797  | 0.068954 | 0.27151 |
| <i>Romboutsia</i>             | -0.56988 | 0.088614 | 0.32839 |
| <i>Turicibacter</i>           | -0.75866 | 0.1167   | 0.39181 |
| <i>Roseburia</i>              | -0.49312 | 0.1182   | 0.39181 |
| <i>Bilophila</i>              | 0.53146  | 0.12438  | 0.39181 |
| <i>Christensenella</i>        | -0.71317 | 0.13841  | 0.41522 |
| <i>Catabacter</i>             | -0.59923 | 0.19195  | 0.53651 |
| <i>Catenibacterium</i>        | 0.81834  | 0.20079  | 0.53651 |
| <i>Peptococcus</i>            | -0.59068 | 0.20863  | 0.53651 |
| <i>Victivallis</i>            | 0.61617  | 0.21463  | 0.53651 |
| <i>Blautia</i>                | -0.31129 | 0.22142  | 0.53651 |
| <i>Eggerthella</i>            | -0.5123  | 0.23518  | 0.54875 |
| <i>Butyricimonas</i>          | -0.4532  | 0.25347  | 0.5703  |
| <i>Barnesiella</i>            | -0.51035 | 0.26282  | 0.57096 |
| <i>Holdemania</i>             | 0.37302  | 0.27495  | 0.57226 |
| <i>Clostridium</i>            | -0.34033 | 0.28159  | 0.57226 |
| <i>Erysipelatoclostridium</i> | -0.45978 | 0.29973  | 0.58028 |
| <i>Granulicatella</i>         | 0.35219  | 0.31062  | 0.58028 |
| <i>Fusicatenibacter</i>       | -0.22922 | 0.31317  | 0.58028 |
| <i>Prevotella</i>             | -0.53648 | 0.3332   | 0.59976 |
| <i>Lachnoclostridium</i>      | -0.24522 | 0.34538  | 0.60441 |
| <i>Eubacterium</i>            | -0.19001 | 0.38745  | 0.64532 |
| <i>Haemophilus</i>            | -0.43256 | 0.38924  | 0.64532 |
| <i>Alistipes</i>              | 0.21102  | 0.40155  | 0.64866 |
| <i>Howardella</i>             | 0.3927   | 0.41615  | 0.65544 |
| <i>Faecalibacterium</i>       | -0.17142 | 0.43802  | 0.67306 |
| <i>Tyzzerella</i>             | 0.23234  | 0.49425  | 0.74138 |
| <i>Oscillospira</i>           | -0.22238 | 0.53015  | 0.75435 |
| <i>Sutterella</i>             | -0.36089 | 0.54093  | 0.75435 |
| <i>Dielma</i>                 | -0.26119 | 0.55393  | 0.75435 |
| <i>Ruminococcus</i>           | 0.15226  | 0.5652   | 0.75435 |

|                               |            |            |          |
|-------------------------------|------------|------------|----------|
| <i>Dorea</i>                  | -0.13408   | 0.57474    | 0.75435  |
| <i>Coprococcus</i>            | -0.12733   | 0.6088     | 0.78274  |
| <i>Dialister</i>              | -0.2692    | 0.66481    | 0.83173  |
| <i>Candidatus_Soleaferrea</i> | -0.24139   | 0.67331    | 0.83173  |
| <i>Paraprevotella</i>         | 0.16165    | 0.75975    | 0.89631  |
| <i>Parasutterella</i>         | 0.14444    | 0.76043    | 0.89631  |
| <i>Odoribacter</i>            | 0.080339   | 0.77325    | 0.89631  |
| <i>Allisonella</i>            | -0.12495   | 0.78258    | 0.89631  |
| <i>Rothia</i>                 | 0.085236   | 0.81035    | 0.89631  |
| <i>Phascolarctobacterium</i>  | 0.14786    | 0.81095    | 0.89631  |
| <i>Adlercreutzia</i>          | -0.070147  | 0.84896    | 0.92214  |
| <i>Bacteroides</i>            | 0.034011   | 0.86858    | 0.92746  |
| <i>Oscillibacter</i>          | 0.016785   | 0.94016    | 0.98717  |
| <i>Senegalemassilia</i>       | -0.0060053 | 0.98676    | 1        |
| <i>Anaerostipes</i>           | -0.003831  | 0.9914     | 1        |
| <i>Dehalobacterium</i>        | -0.0081582 | 1          | 1        |
| Family                        |            |            |          |
| Lactobacillaceae              | 1.5095     | 0.00091988 | 0.058901 |
| Melainabacteriaceae           | -2.0743    | 0.0017001  | 0.058901 |
| Oxalobacteraceae              | 1.4027     | 0.0060622  | 0.05968  |
| Enterobacteriaceae            | 1.4804     | 0.0070211  | 0.05968  |
| Bifidobacteriaceae            | 0.93625    | 0.013598   | 0.092463 |
| Streptococcaceae              | -0.79126   | 0.017924   | 0.10157  |
| Victivallaceae                | 0.97609    | 0.05227    | 0.25388  |
| Rs_045                        | -0.56548   | 0.063949   | 0.27178  |
| Unclassified_Clostridiales    | 0.79644    | 0.10983    | 0.37554  |
| Porphyromonadaceae            | 0.34068    | 0.11045    | 0.37554  |
| Peptostreptococcaceae         | -0.50465   | 0.12475    | 0.3856   |
| Mogibacteriaceae              | -0.49315   | 0.22417    | 0.53536  |
| Prevotellaceae                | -0.57496   | 0.23548    | 0.53536  |
| Desulfovibrionaceae           | 0.40042    | 0.23619    | 0.53536  |
| Eubacteriaceae                | -0.23726   | 0.25525    | 0.5424   |
| Veillonellaceae               | -0.45428   | 0.33539    | 0.62624  |
| Acidaminococcaceae            | 0.53468    | 0.34327    | 0.62624  |
| Erysipelotrichaceae           | -0.28425   | 0.35528    | 0.62624  |
| Catabacteriaceae              | -0.39774   | 0.36838    | 0.62624  |
| Carnobacteriaceae             | 0.26948    | 0.45145    | 0.73091  |
| Coriobacteriaceae             | 0.20949    | 0.48316    | 0.7467   |
| Clostridiaceae                | -0.1959    | 0.50902    | 0.75246  |
| Christensenellaceae           | 0.22884    | 0.61102    | 0.80633  |
| Rikenellaceae                 | 0.11654    | 0.63187    | 0.80633  |
| Peptococcaceae                | -0.22577   | 0.63984    | 0.80633  |



|                     |           |           |          |
|---------------------|-----------|-----------|----------|
| Bacteroidaceae      | -0.097746 | 0.64412   | 0.80633  |
| Pasteurellaceae     | -0.20829  | 0.6692    | 0.80633  |
| Ruminococcaceae     | -0.068439 | 0.68775   | 0.80633  |
| Lachnospiraceae     | -0.071681 | 0.73806   | 0.83647  |
| Micrococcaceae      | 0.081688  | 0.81698   | 0.88888  |
| Oscillospiraceae    | -0.041361 | 0.83659   | 0.88888  |
| Sutterellaceae      | -0.055242 | 0.86409   | 0.89027  |
| Dehalobacteriaceae  | 0.018086  | 0.959     | 0.959    |
| Order               |           |           |          |
| Desulfovibrionales  | 0.7387    | 0.021049  | 0.097433 |
| Melainabacteriales  | -1.467    | 0.022926  | 0.097433 |
| Lactobacillales     | -0.61157  | 0.055204  | 0.1877   |
| Victivallales       | 0.83628   | 0.092873  | 0.22555  |
| Pasteurellales      | -0.78417  | 0.1066    | 0.22652  |
| I025                | -0.44448  | 0.12342   | 0.23312  |
| Burkholderiales     | 0.34639   | 0.2379    | 0.40443  |
| Coriobacteriales    | 0.30225   | 0.34814   | 0.53803  |
| RF32                | 0.39065   | 0.517     | 0.69192  |
| Selenomonadales     | 0.2215    | 0.58232   | 0.69192  |
| Clostridiales       | 0.089626  | 0.58953   | 0.69192  |
| Actinomycetales     | 0.16548   | 0.61052   | 0.69192  |
| Bacteroidales       | -0.049846 | 0.73699   | 0.78305  |
| Erysipelotrichales  | -0.042592 | 0.89137   | 0.89137  |
| Class               |           |           |          |
| Bacilli             | -0.89177  | 0.0068279 | 0.10149  |
| Melainabacteria     | -1.5129   | 0.018562  | 0.10149  |
| Actinobacteria      | 0.73916   | 0.01903   | 0.10149  |
| ?                   | -0.49273  | 0.029949  | 0.11979  |
| Deltaproteobacteria | 0.63639   | 0.043222  | 0.13831  |
| TM7_3               | -0.56296  | 0.056301  | 0.15013  |
| Lentisphaeria       | 0.68928   | 0.16416   | 0.37022  |
| Gammaproteobacteria | 0.60013   | 0.18511   | 0.37022  |
| Erysipelotrichi     | 0.47926   | 0.21793   | 0.38743  |
| Bacteroidia         | -0.11134  | 0.42999   | 0.68798  |
| Alphaproteobacteria | 0.35687   | 0.55182   | 0.73853  |
| Coriobacteriia      | 0.24621   | 0.6056    | 0.73853  |
| Betaproteobacteria  | 0.14647   | 0.62249   | 0.73853  |
| Negativicutes       | 0.1804    | 0.64621   | 0.73853  |
| Erysipelotrichia    | -0.084652 | 0.78153   | 0.83363  |
| Clostridia          | -0.001766 | 0.99002   | 0.99002  |
| Phylum              |           |           |          |
| Proteobacteria      | 0.49245   | 0.019688  | 0.078751 |

|                              |          |          |         |
|------------------------------|----------|----------|---------|
| CyanobacteriaMelainabacteria | -1.2146  | 0.053858 | 0.1275  |
| Lentisphaerae                | 0.88548  | 0.079689 | 0.1275  |
| TM7                          | -0.3794  | 0.27973  | 0.37298 |
| Firmicutes                   | 0.11117  | 0.44425  | 0.50772 |
| Bacteroidetes                | 0.087331 | 0.64113  | 0.64113 |

Log2FC: logarithm 2 fold change (positive value when the abundance increases in group of consumption >5 serv/d of adjusted UPFs); FDR: False Discovery Rate.

**Supplementary Table S5.** Non-significant bacterial taxa (FDR>0.05) analyzed by EdgeR between women who consumed less than 3 and more than 5 servings per day of UPFs.

|                               | log2FC   | Pvalues   | FDR      |
|-------------------------------|----------|-----------|----------|
| Genus                         |          |           |          |
| <i>Bacteroides</i>            | 1.0775   | 0.0033593 | 0.05207  |
| <i>Romboutsia</i>             | 1.5112   | 0.0057909 | 0.071807 |
| <i>Gemmiger</i>               | 1.3974   | 0.0093589 | 0.08904  |
| <i>Clostridium</i>            | -1.1993  | 0.010053  | 0.08904  |
| <i>Lactobacillus</i>          | 1.2702   | 0.013103  | 0.10154  |
| <i>Lachnoclostridium</i>      | 0.91369  | 0.015553  | 0.10715  |
| <i>Oscillospira</i>           | -1.1448  | 0.029235  | 0.18125  |
| <i>Turicibacter</i>           | -1.5627  | 0.034899  | 0.18275  |
| <i>Paraprevotella</i>         | 1.5486   | 0.035371  | 0.18275  |
| <i>Sutterella</i>             | 1.7487   | 0.041707  | 0.18563  |
| <i>Parabacteroides</i>        | 0.8396   | 0.043611  | 0.18563  |
| <i>Adlercreutzia</i>          | 0.96408  | 0.047993  | 0.18563  |
| <i>Eggerthella</i>            | 1.0868   | 0.048994  | 0.18563  |
| <i>Veillonella</i>            | 1.4308   | 0.052106  | 0.18563  |
| <i>Saccharibacteria</i>       | 0.93266  | 0.053892  | 0.18563  |
| <i>Streptococcus</i>          | 1.1053   | 0.076648  | 0.25012  |
| <i>Butyrivimonas</i>          | 0.80558  | 0.11302   | 0.32053  |
| <i>Phascolarctobacterium</i>  | 1.2254   | 0.11782   | 0.32053  |
| <i>Melainabacter</i>          | 1.2892   | 0.11895   | 0.32053  |
| <i>Roseburia</i>              | -0.67942 | 0.1233    | 0.32053  |
| <i>Dielma</i>                 | -1.085   | 0.12484   | 0.32053  |
| <i>Alistipes</i>              | 0.63498  | 0.13349   | 0.32053  |
| <i>Bifidobacterium</i>        | 0.84769  | 0.13591   | 0.32053  |
| <i>Faecalibacterium</i>       | 0.4955   | 0.13959   | 0.32053  |
| <i>Holdemania</i>             | 0.5913   | 0.15862   | 0.34916  |
| <i>Oscillibacter</i>          | -0.49912 | 0.16332   | 0.34916  |
| <i>Erysipelatoclostridium</i> | 0.77414  | 0.17959   | 0.37114  |
| <i>Collinsella</i>            | 0.60807  | 0.1908    | 0.37424  |
| <i>Victivallis</i>            | -0.91643 | 0.19664   | 0.37424  |

|                               |           |          |         |
|-------------------------------|-----------|----------|---------|
| <i>Peptococcus</i>            | 0.69652   | 0.19919  | 0.37424 |
| <i>Butyrivibrio</i>           | -1.2023   | 0.21789  | 0.39362 |
| <i>Anaerofilum</i>            | -0.59333  | 0.22379  | 0.39362 |
| <i>Parasutterella</i>         | 0.80402   | 0.23408  | 0.39362 |
| <i>Fusicatenibacter</i>       | 0.41973   | 0.2349   | 0.39362 |
| <i>Allisonella</i>            | 0.75112   | 0.25832  | 0.41868 |
| <i>Catabacter</i>             | 0.71895   | 0.26628  | 0.41868 |
| <i>Coproccoccus</i>           | 0.38566   | 0.27011  | 0.41868 |
| <i>Barnesiella</i>            | -0.69812  | 0.28288  | 0.42776 |
| <i>cc_115</i>                 | 0.45153   | 0.30856  | 0.45549 |
| <i>Howardella</i>             | -0.55704  | 0.37711  | 0.53138 |
| <i>Lachnospira</i>            | -0.52758  | 0.38963  | 0.53682 |
| <i>Eubacterium</i>            | 0.25393   | 0.40694  | 0.54848 |
| <i>Christensenella</i>        | -0.45065  | 0.42013  | 0.55422 |
| <i>Odoribacter</i>            | -0.32269  | 0.43706  | 0.55845 |
| <i>Prevotella</i>             | 0.57413   | 0.45387  | 0.55845 |
| <i>Tyzzera</i>                | -0.31617  | 0.45715  | 0.55845 |
| <i>Dorea</i>                  | -0.32525  | 0.45937  | 0.55845 |
| <i>Haemophilus</i>            | -0.42298  | 0.6458   | 0.77    |
| <i>Ruminococcus</i>           | -0.18363  | 0.7101   | 0.81193 |
| <i>Oxalobacter</i>            | 0.20183   | 0.71997  | 0.81193 |
| <i>Catenibacterium</i>        | 0.27376   | 0.72054  | 0.81193 |
| <i>Bilophila</i>              | -0.19793  | 0.73552  | 0.81193 |
| <i>Dehalobacterium</i>        | -0.15799  | 0.74645  | 0.81193 |
| <i>Acidaminococcus</i>        | -0.24665  | 0.84189  | 0.8975  |
| <i>Shigella</i>               | -0.18959  | 0.85407  | 0.8975  |
| <i>Senegalemassilia</i>       | -0.097961 | 0.87489  | 0.90405 |
| <i>Candidatus_Soleaferrea</i> | -0.13671  | 0.89148  | 0.9061  |
| <i>Dialister</i>              | -0.015896 | 0.97884  | 0.97884 |
| Family                        |           |          |         |
| Lactobacillaceae              | 1.1979    | 0.019354 | 0.12774 |
| Sutterellaceae                | 1.0788    | 0.031387 | 0.17263 |
| Streptococcaceae              | 1.1179    | 0.061828 | 0.29147 |
| Rs_045                        | 0.85885   | 0.084824 | 0.34671 |
| Rikenellaceae                 | 0.67804   | 0.099021 | 0.34671 |
| Victivallaceae                | -1.1177   | 0.11676  | 0.34671 |
| Acidaminococcaceae            | 1.0686    | 0.11945  | 0.34671 |
| Mogibacteriaceae              | -0.73076  | 0.14002  | 0.34671 |
| Porphyromonadaceae            | 0.4804    | 0.14039  | 0.34671 |
| Peptococcaceae                | 0.77571   | 0.14709  | 0.34671 |
| Bifidobacteriaceae            | 0.7356    | 0.20177  | 0.42339 |
| Melainabacteriaceae           | 1.0346    | 0.20528  | 0.42339 |

|                            |           |          |          |
|----------------------------|-----------|----------|----------|
| Oscillospiraceae           | -0.36413  | 0.24547  | 0.4765   |
| Coriobacteriaceae          | 0.41467   | 0.32183  | 0.55897  |
| Eubacteriaceae             | 0.2455    | 0.39131  | 0.61839  |
| Unclassified_Clostridiales | -0.54135  | 0.39352  | 0.61839  |
| Veillonellaceae            | 0.45727   | 0.44057  | 0.64482  |
| Catabacteriaceae           | 0.46558   | 0.46124  | 0.64482  |
| Prevotellaceae             | 0.47354   | 0.46896  | 0.64482  |
| Pasteurellaceae            | -0.55507  | 0.52258  | 0.6898   |
| Dehalobacteriaceae         | -0.30958  | 0.54355  | 0.68989  |
| Desulfovibrionaceae        | -0.29439  | 0.58003  | 0.70893  |
| Lachnospiraceae            | -0.17727  | 0.6289   | 0.7412   |
| Enterobacteriaceae         | -0.40133  | 0.66732  | 0.75936  |
| Erysipelotrichaceae        | -0.12451  | 0.7537   | 0.82907  |
| Christensenellaceae        | 0.13457   | 0.79082  | 0.84184  |
| Ruminococcaceae            | 0.059968  | 0.82563  | 0.85143  |
| Oxalobacteraceae           | 0.034598  | 0.94168  | 0.94168  |
| Order                      |           |          |          |
| Bacteroidales              | 0.72169   | 0.004629 | 0.074064 |
| RF32                       | -2.0138   | 0.025623 | 0.20498  |
| Burkholderiales            | 0.98587   | 0.042474 | 0.22653  |
| Pasteurellales             | -1.528    | 0.06967  | 0.27868  |
| Lactobacillales            | 0.90133   | 0.12486  | 0.29254  |
| Selenomonadales            | 0.72029   | 0.12798  | 0.29254  |
| Bifidobacteriales          | 0.76186   | 0.18018  | 0.36037  |
| Melainabacteriales         | 0.97117   | 0.24006  | 0.40363  |
| Victivallales              | -0.80195  | 0.25227  | 0.40363  |
| I025                       | 0.49588   | 0.28013  | 0.40747  |
| Coriobacteriales           | 0.2784    | 0.4627   | 0.58066  |
| Enterobacteriales          | -0.6578   | 0.47179  | 0.58066  |
| Desulfovibrionales         | -0.29296  | 0.55177  | 0.63059  |
| Clostridiales              | -0.11624  | 0.61814  | 0.65935  |
| Erysipelotrichales         | -0.073674 | 0.8724   | 0.8724   |
| Class                      |           |          |          |
| Alphaproteobacteria        | -2.3022   | 0.010586 | 0.084685 |
| Betaproteobacteria         | 1.0111    | 0.032476 | 0.16507  |
| Actinobacteria             | 0.94971   | 0.041611 | 0.16507  |
| Erysipelotrichi            | 0.63456   | 0.099874 | 0.26633  |
| Negativicutes              | 0.71439   | 0.12473  | 0.2851   |
| TM7_3                      | 0.64797   | 0.15297  | 0.28683  |
| Bacilli                    | 0.80048   | 0.16134  | 0.28683  |
| Lentisphaeria              | -0.74606  | 0.28617  | 0.45788  |
| Melainabacteria            | 0.81705   | 0.31486  | 0.45798  |

|                              |           |          |         |
|------------------------------|-----------|----------|---------|
| Gammaproteobacteria          | -0.70793  | 0.36542  | 0.48723 |
| Deltaproteobacteria          | -0.25603  | 0.62015  | 0.76326 |
| Coriobacteriia               | 0.15831   | 0.75642  | 0.86448 |
| Erysipelotrichia             | -0.047767 | 0.9211   | 0.94883 |
| Clostridia                   | 0.012021  | 0.94883  | 0.94883 |
| Phylum                       |           |          |         |
| Actinobacteria               | 0.89132   | 0.032458 | 0.12983 |
| Lentisphaerae                | -1.3896   | 0.051135 | 0.13636 |
| CyanobacteriaMelainabacteria | 1.1834    | 0.15378  | 0.30755 |
| TM7                          | 0.57946   | 0.20678  | 0.32011 |
| Firmicutes                   | 0.16061   | 0.24009  | 0.32011 |
| Proteobacteria               | 0.32024   | 0.32597  | 0.37253 |

Log2FC: logarithm 2 fold change (positive value when the abundance increases in group of consumption >5 serv/d of adjusted UPFs); FDR: False Discovery Rate.
